# Supplementary material for: Comparative Analysis of Calcium-Dependent Protein Kinase in Cucurbitaceae and Expression Studies in Watermelon
Source: MDPI journal article supplement (doi:10.3390/ijms20102527), 2019-05-23
Supplement: s1 [file s1]

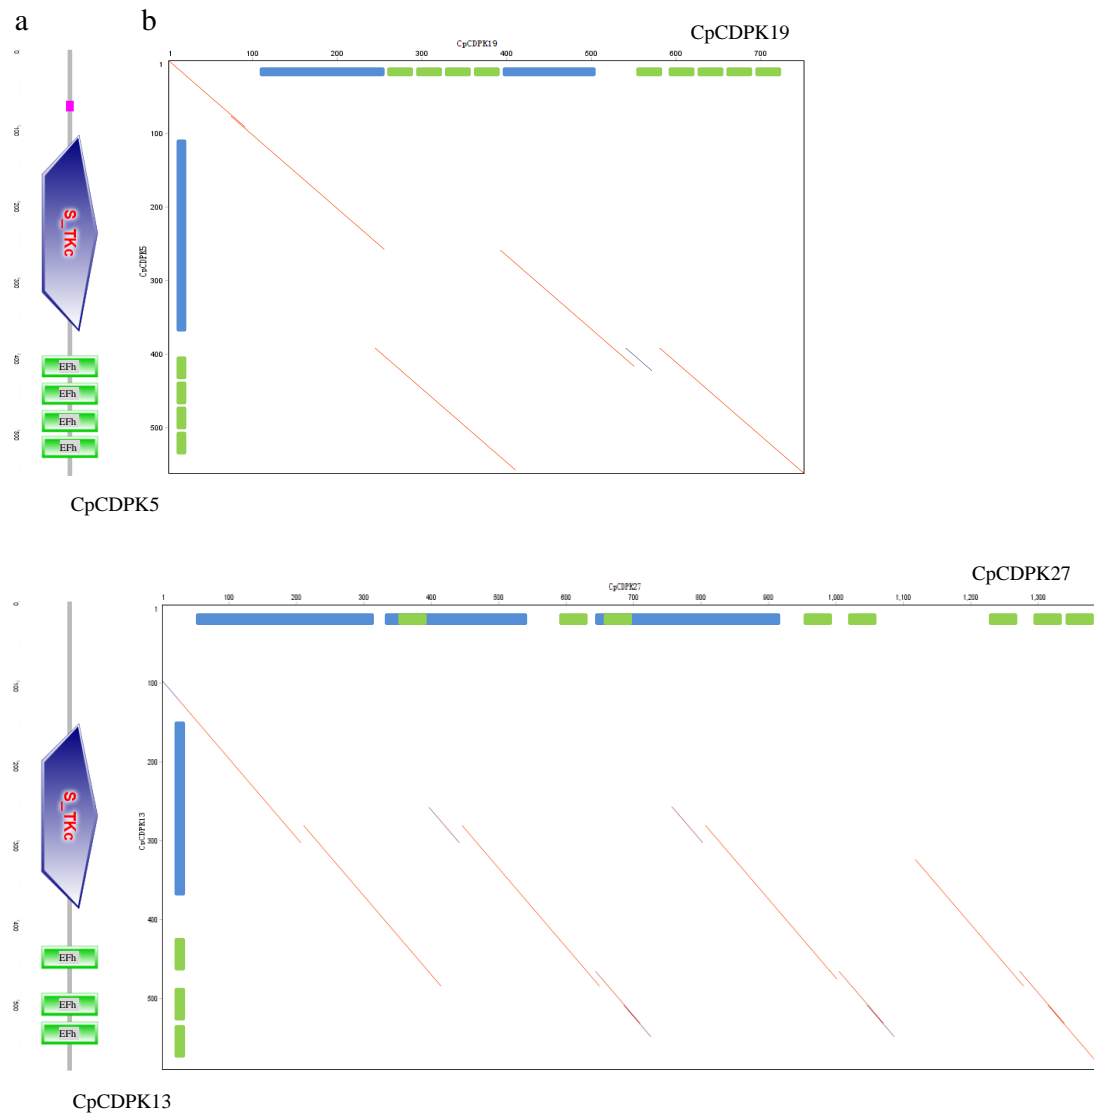

**Figure S1.** Domain prediction and Dot plot analysis of four CpCDPKs. **(a)** Domain composition of CpCDPK5 and CpCDPK13; **(b)** Dot plot analyses of CpCDPK homologs. Blue and green rectangles represent STKs\_CAMK protein kinase and EF-hand domain, respectively.

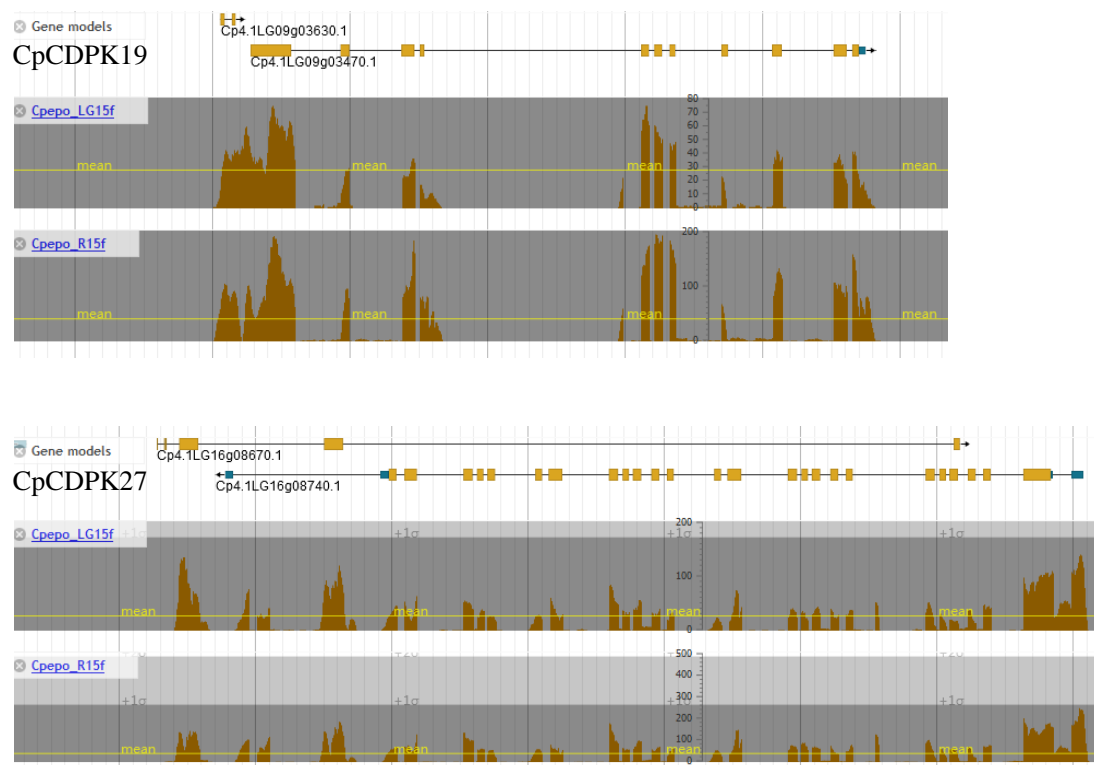

**Figure S2.** Expression levels of *CpCDPK19* and *CpCDPK27* using transcriptome data (BioProject: PRJNA339848) on the Cucurbit Genomics Database. LG: oilseed pumpkin, 'Lady Godiva'; R: acorn squash, 'Sweet REBA'; f: fruit; 15: 15 days after pollination.

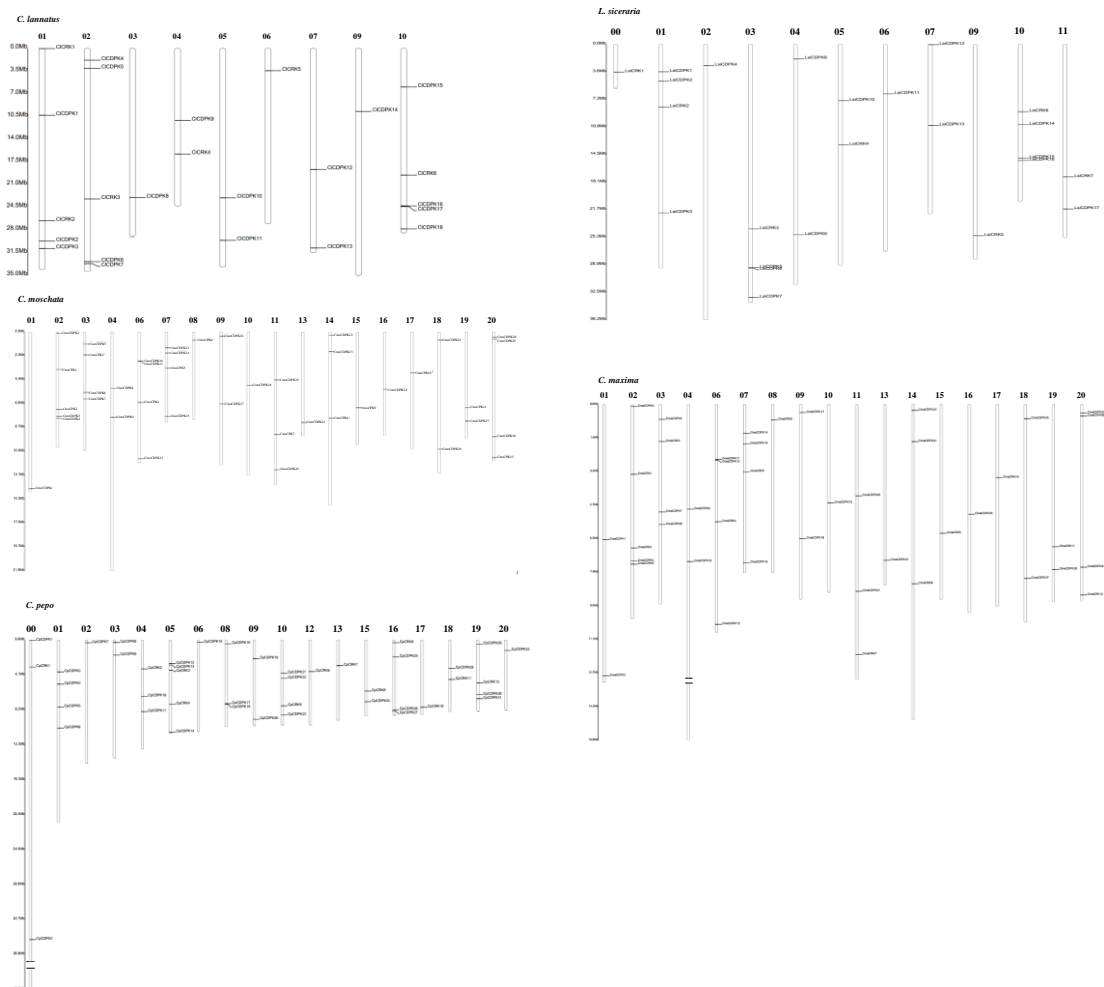

**Figure S3.** Chromosomal distributions of *CDPK* and *CRK* genes in five Cucurbitaceae species.

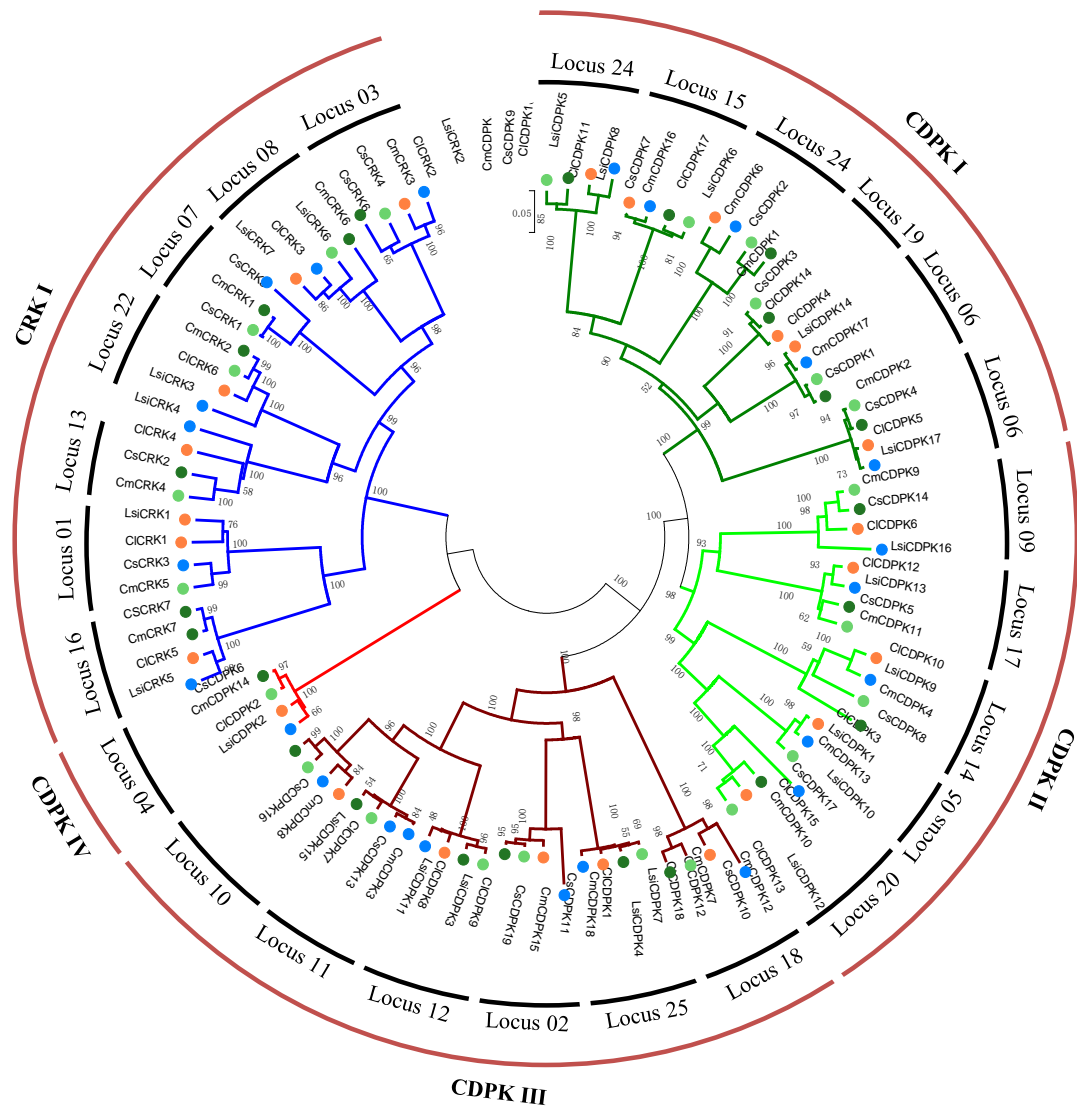

**Figure S4.** Phylogenetic tree of CDPKs and CRKs from four species in the Benincaseae tribe.

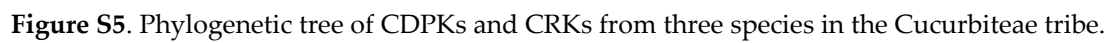

**Figure S5.** Phylogenetic tree of CDPKs and CRKs from three species in the Cucurbiteae tribe.

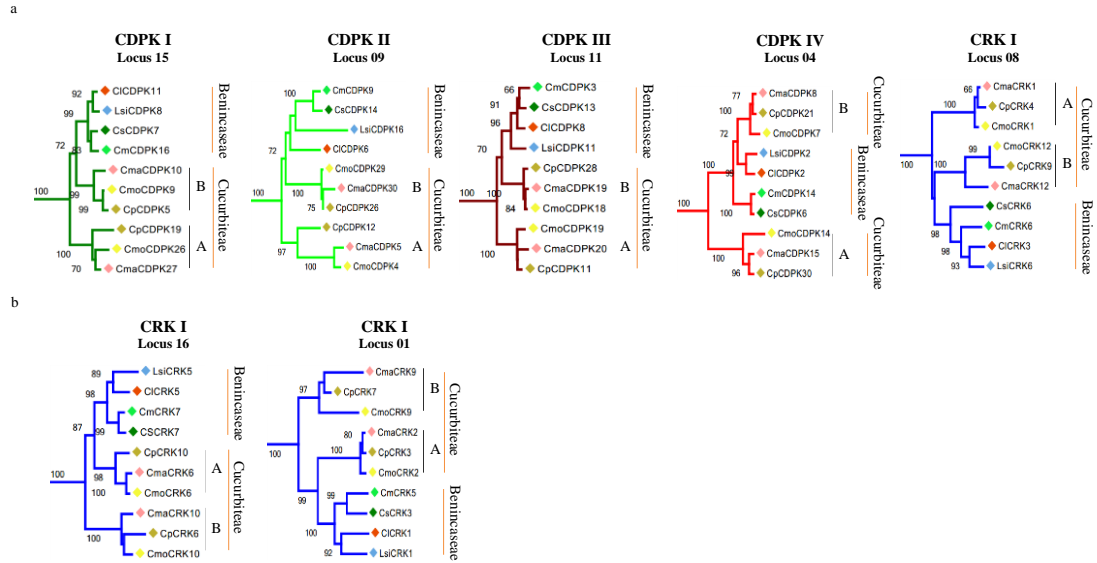

**Figure S6.** Detailed topologies of seven loci in Figure 3. (a) Compared to sub-genome A, CDPK/CRK homologs from sub-genome B were clustered with that from Benincaseae genus; (b) CRKs from sub-genome A showed close relationships with that from the Benincaseae genus in loci 01 and 16.

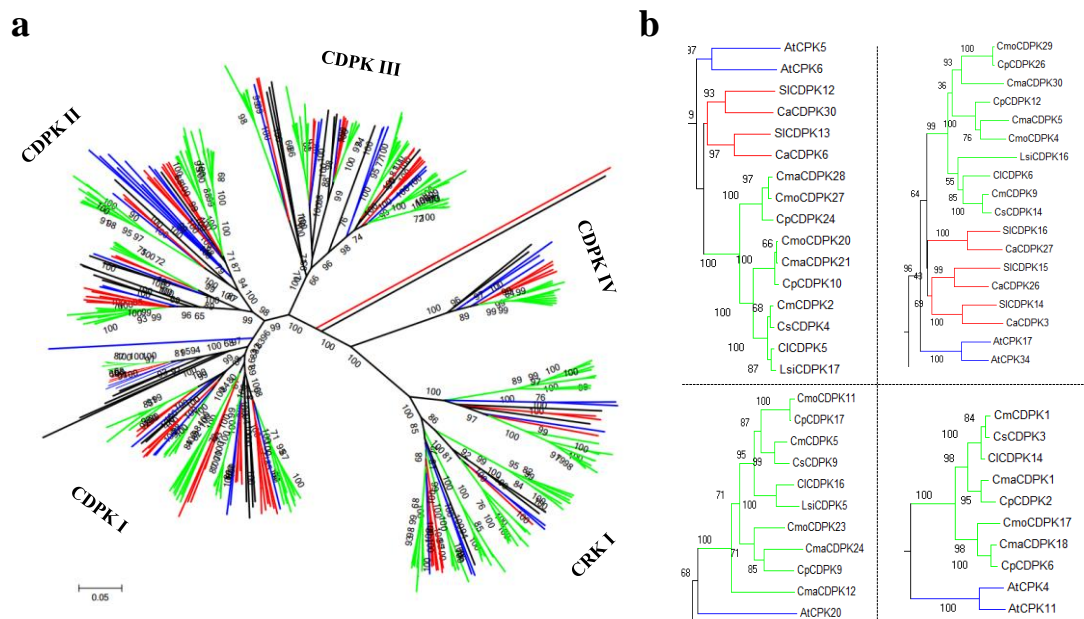

**Figure S7.** Phylogenetic tree constructed with CDPK and CRK homologs from four families (a). Homologs from Cucurbitaceae (including six species), Solanaceae (including tomato and pepper), Cruciferae (*Arabidopsis*), and Poaceae (rice) were marked in green, red, blue, and black, respectively; (b) Magnified views of four clades in phylogenetic tree (a).

### CDPK I

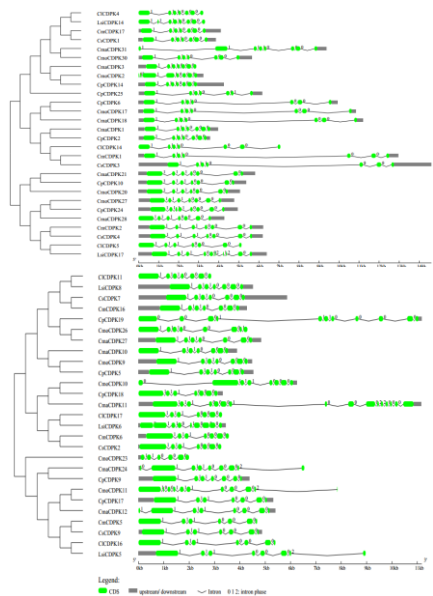

### CDPK III

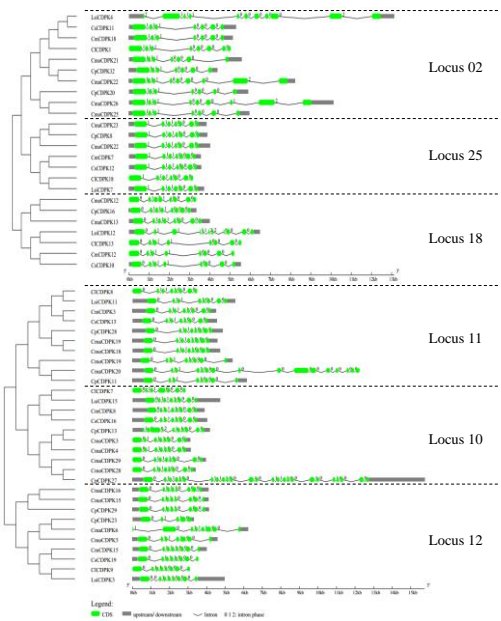

### CDPK II

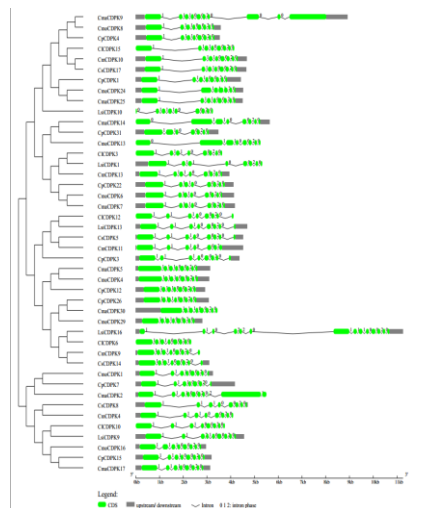

### CDPK IV

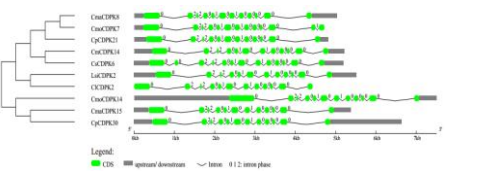

### CRK I

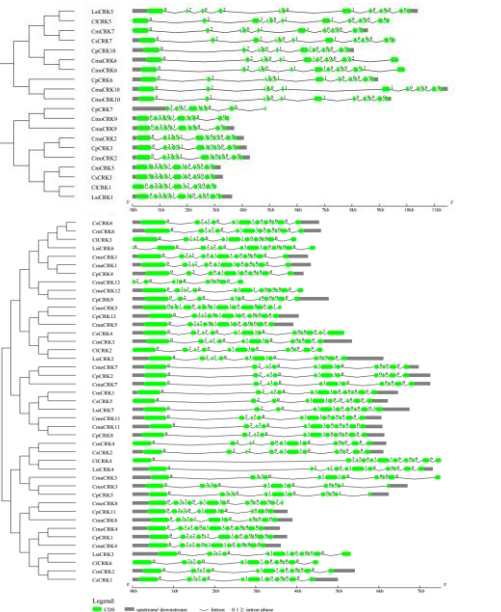

**Figure S8.** Exon-intron organizations of CDPKs and CRKs in Cucurbitaceae.
